# Supplementary material
Source: MDPI journal article supplement (https://www.mdpi.com/2079-6412/13/4/748)
Supplement: s1 [file s1]

# Study on the Solder Joint Reliability of New Diamond Chip Resistors for Power Devices

Wenyu Wu <sup>1</sup>, Geng Li <sup>2</sup>, Shang Wang <sup>2,\*</sup>, Yiping Wang <sup>2</sup>, Jiayun Feng <sup>2</sup>, Xiaowei Sun <sup>1</sup> and Yanhong Tian <sup>2,\*</sup>

<sup>1</sup> NO. 38 Research Institute, China Electronics Technology Group Corporation, Hefei 230031, China

<sup>2</sup> State Key Laboratory of Advanced Welding and Joining, Harbin Institute of Technology, Harbin 150001, China

\* Correspondence: wangshang@hit.edu.cn (S.W.), tianyh@hit.edu.cn (Y.T.)

**Table S1.** Material properties at 25 °C.

| Position              | Materials               | Properties            |                             |                 |                               |
|-----------------------|-------------------------|-----------------------|-----------------------------|-----------------|-------------------------------|
|                       |                         | Young's Modulus (GPa) | CTE (ppm·°C <sup>-1</sup> ) | Poisson's Ratio | Density (Kg·m <sup>-3</sup> ) |
| Shell                 | 5A06 Al alloy           | 270                   | 24                          | 0.33            | 2.63                          |
| Substrate of resistor | Diamond                 | 1200                  | 2                           | 0.20            | 3.51                          |
| Solder                | SnPb                    | 30.55                 | 25.4                        | 0.35            | 8.46                          |
| Pad                   | Copper                  | 128.93                | 17.6                        | 0.34            | 8.94                          |
| Microstrip plate      | Organic                 | 16.9                  | 14                          | 0.11            | 1.98                          |
|                       | silicon and fluorinated | (X&Y)                 | (X&Y)                       | (XY)            |                               |
|                       | material                | 7.4                   | 35                          | 0.39            |                               |
|                       |                         | (Z)                   | (Z)                         | (YZ&XZ)         |                               |

**Table S2.** Anand's constants of SnPb solder.

| Ansys | Parameter                 | Value           | Definition                                              |
|-------|---------------------------|-----------------|---------------------------------------------------------|
| A1    | $S_0$ (Mpa)               | 12.4            | Initial value of deformation resistance                 |
| A2    | $Q/R$ (K)                 | 9400            | Activation energy                                       |
| A3    | $A$ ( $\text{sec}^{-1}$ ) | $4 \times 10^6$ | Pre-exponential factor                                  |
| A4    | $\varepsilon$             | 1.5             | Multiplier of stress                                    |
| A5    | $m$                       | 0.303           | Strain rate sensitivity of stress                       |
| A6    | $H_0$ (MPa)               | 1379            | Harden constant                                         |
| A7    | $\hat{s}$ (MPa)           | 13.8            | Coefficient for deformation resistance saturation value |
| A8    | $n$                       | 0.07            | Deformation resistance value                            |
| A9    | $a$                       | 1.3             | Strain rate sensitivity of hardening                    |

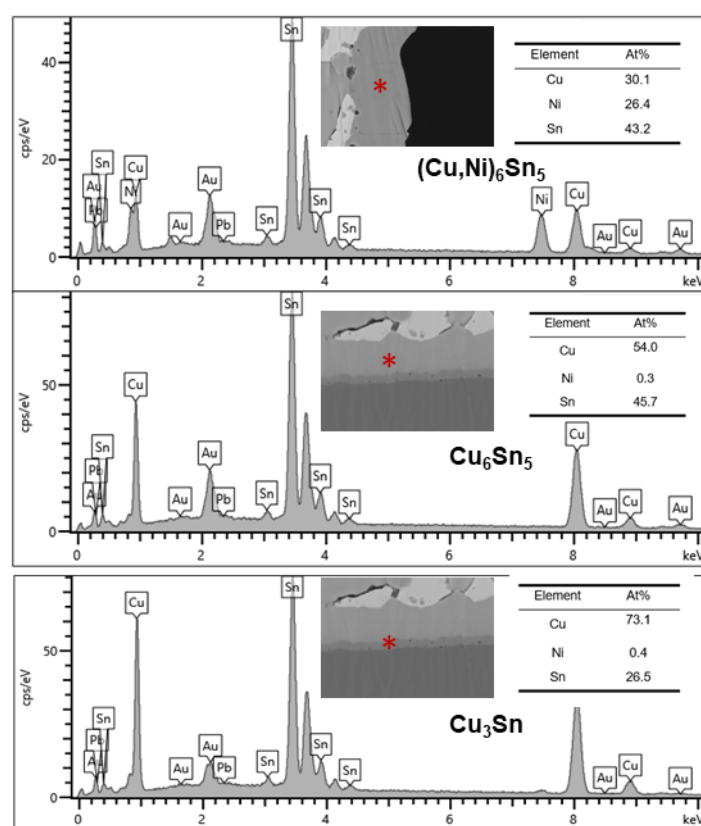**Figure S1.** EDS results of IMCs.
